# Supplementary material for: AGE-Rich Bread Crust Extract Boosts Oxidative Stress Interception via Stimulation of the NRF2 Pathway
Source: MDPI journal article supplement (doi:10.3390/nu13113874), 2021-10-29
Supplement: s1 [file s1]

## Supplemental data

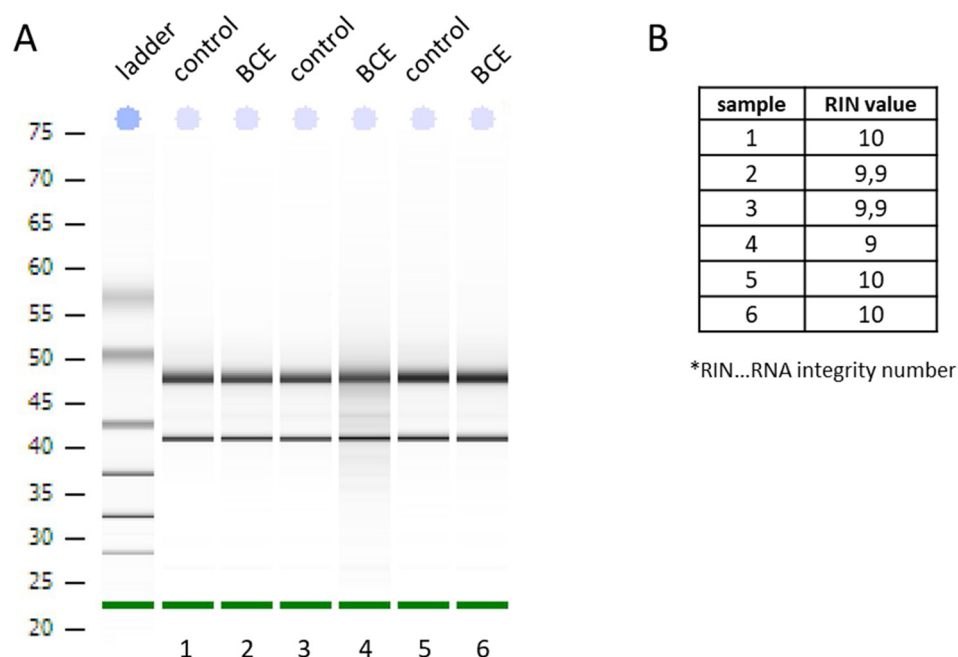

**Figure S1: RNA template examination for microarray analyses.** Integrity of six RNA samples of control vs. bread crust extract (BCE) treated EA.hy926 cells, was verified by bioanalyzer (A). The RNA integrity number (RIN) values are summarized in table (B).

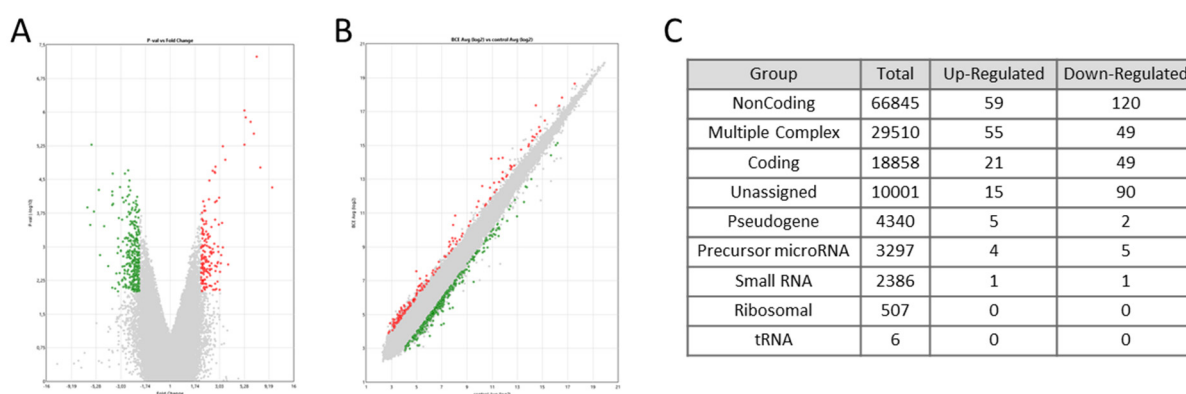

**Figure S2: Microarray data: Differentially expressed RNAs of control vs. bread crust extract (BCE) treated EA.hy926 cells.** Cluster analyses of differentially expressed RNAs. (A) Volcano plot analysis of control vs. BCE group. The x-axis represents the difference between the two stimulation conditions (fold change) and the y-axis represents the  $-\log_{10}$  p-value. (B) Scatter plot analysis of BCE average ( $\log_2$ ) vs. control average ( $\log_2$ ) group. Significantly up-regulated RNAs are represented as red dots and down-regulated RNAs are represented as green dots. (C) Summary table of the number of differentially expressed RNAs.

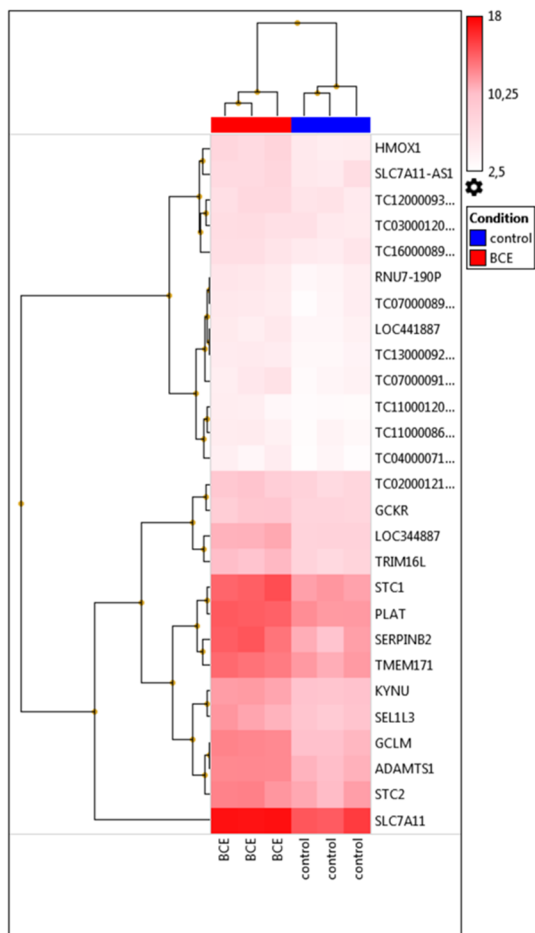

**Figure S3: Hierarchical clustering analyses of up-regulated RNAs.**

**Table S1: Array data - up-regulated precursor microRNAs.**

| ID                | BCE Avg (log2) | control Avg (log2) | Fold Change | P-val  | FDR P-val | Gene Symbol | Description   | Group              |
|-------------------|----------------|--------------------|-------------|--------|-----------|-------------|---------------|--------------------|
| TC1200011336.hg.1 | 6,28           | 5                  | 2,42        | 0,0026 | 0,6402    | AC068797.1  |               | Precursor_microRNA |
| TC1000006952.hg.1 | 5,03           | 3,95               | 2,12        | 0,0084 | 0,7304    | MIR4675     | microRNA 4675 | Precursor_microRNA |
| TC0200015294.hg.1 | 4,53           | 3,45               | 2,12        | 0,0005 | 0,5599    | AC073973.1  |               | Precursor_microRNA |
| TC1100008307.hg.1 | 7,78           | 6,78               | 2,01        | 0,0055 | 0,7028    | MIR6754     | microRNA 6754 | Precursor_microRNA |

**Table S2: Array data - down-regulated precursor microRNAs.**

| ID                | BCE Avg (log2) | control Avg (log2) | Fold Change | P-val  | FDR P-val | Gene Symbol | Description   | Group              |
|-------------------|----------------|--------------------|-------------|--------|-----------|-------------|---------------|--------------------|
| TC1200010743.hg.1 | 8,68           | 10,23              | -2,93       | 0,0057 | 0,7028    | AC021066.1  |               | Precursor_microRNA |
| TC1700011284.hg.1 | 3,53           | 4,81               | -2,42       | 0,007  | 0,7234    | MIR301A     | microRNA 301a | Precursor_microRNA |
| TC2200008882.hg.1 | 4,64           | 5,8                | -2,24       | 0,0003 | 0,4964    | Z93241.1    |               | Precursor_microRNA |
| TC1100007575.hg.1 | 4,95           | 6,01               | -2,09       | 0,0093 | 0,7304    | AC110283.1  |               | Precursor_microRNA |

|                       |      |      |       |        |        |                |                        |
|-----------------------|------|------|-------|--------|--------|----------------|------------------------|
| TC0300011830.<br>hg.1 | 7,41 | 8,41 | -2,01 | 0,0001 | 0,3942 | AC05572<br>3.1 | Precursor_mic<br>roRNA |
|-----------------------|------|------|-------|--------|--------|----------------|------------------------|

| miRNA precursor (reg)<br>mature miR | Significantly regulated<br>miR-targets (reg)                                            | additional targets<br>connected to NRF2     |
|-------------------------------------|-----------------------------------------------------------------------------------------|---------------------------------------------|
| MIR4675 (↑)<br>hsa-miR-4675         | MYLK2 (↓)                                                                               | RARA, NCOR1                                 |
| MIR6754 (↑)<br>hsa-miR-6754-3p      | PEG10(↓), GALNT10(↓),<br>SLC3A2(↑)                                                      | <b>CUL3</b> , FOXO3, HIF1A                  |
| hsa-miR-6754-5p                     | DHRS2(↓), <b>KRT80(↓)</b> , C20orf96(↓),<br><b>PLXNA4(↓)</b> , CFAP57(↓)<br>PRICKLE1(↑) | CREB3, VEGFA, GPX3,<br>MAPK3, SQSTM1, GSK3B |
| MIR301A(↓)<br>hsa-miR-301a-3p       | ITGB8(↓), FSTL5(↓), TENM1(↓)<br>SEL1L3(↑), BHLHE40(↑), STC1(↑)                          | EIF2AK3, MAF, PPAGR,<br><b>CUL3</b>         |
| hsa-miR-301a-5p                     | <b>KRT80(↓)</b> , <b>PLXNA4(↓)</b><br>SLC7A11(↑)                                        | EIF2AK1, <b>CUL3</b>                        |

**Table S3: Regulated microRNA-precursors following BCE-treatment.** Mature miRs of regulated precursor miRNAs were analyzed for their target proteins using miRDB (1, 2). Targets, which were found to be significantly regulated in the presented array and targets that showed a direct connection to NRF2 in STRING DB-analysis are presented. Targets that are predicted for more than one miR are emphasized in bold. (↑): upregulation, (↓) downregulation.

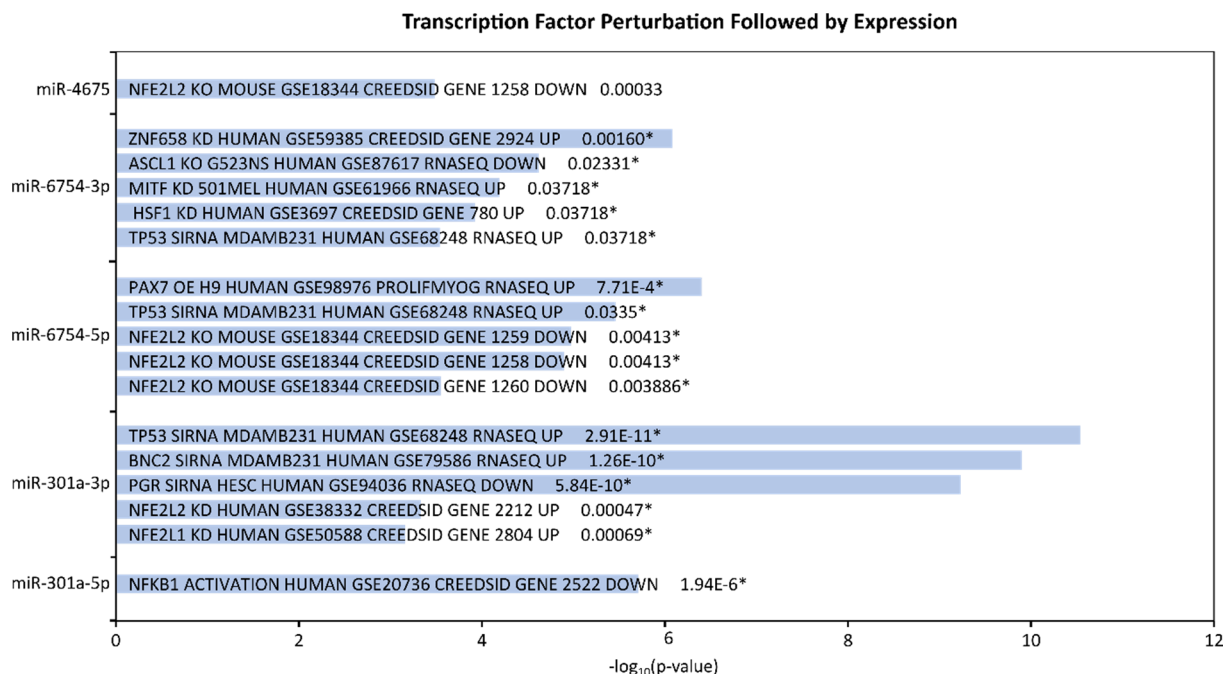

**Figure S4: Enrichment analysis of miR-targets in data sets of gene expression following TF Perturbation.** Interestingly, 3 of 5 target-gene sets analyzed are enriched in expression data-sets following NRF2 perturbation. Data set names and non-adjusted p-values are indicated for a maximum of 5 data sets per mature miR. Analysis was carried out by enrichr. \*: Benjamini-Hochberg-adjusted p-value<0.05

| Gene                                | Description                                 | GenBank accession number | Fold Change | P value  |
|-------------------------------------|---------------------------------------------|--------------------------|-------------|----------|
| <b>antioxidant</b>                  |                                             |                          |             |          |
| NMRAL2P                             | NmrA-like redox sensor 2 pseudogene         | NR_033752                | 6.96        | 5.81E-08 |
| HMOX1                               | heme oxygenase 1                            | NM_002133                | 6.05        | 1.65E-06 |
| SLC7A11                             | solute carrier family 7, member 11          | NM_014331                | 7.59        | 1.72E-05 |
| GCLM                                | glutamate-cysteine ligase, modifier subunit | NM_001308253             | 5.29        | 9.11E-07 |
| NQO1                                | NAD(P)H dehydrogenase, quinone 1            | NM_000903                | 2.41        | 3.34E-05 |
| TXN                                 | thioredoxin                                 | NM_001244938             | 2.01        | 0.001    |
| <b>DMEs &amp; drug transporters</b> |                                             |                          |             |          |
| PTGR1                               | prostaglandin reductase 1                   | NM_001146108             | 2.09        | 9.72E-05 |
| TBXAS1                              | thromboxane A synthase 1                    | NM_001061                | 2.1         | 0.0066   |
| <b>NADPH-generating enzymes</b>     |                                             |                          |             |          |
| G6PD                                | glucose-6-phosphate dehydrogenase           | NM_000402                | 2.17        | 9.00E-04 |
| ME1                                 | malic enzyme 1                              | NM_002395                | 2.15        | 0.0003   |
| <b>metal-binding proteins</b>       |                                             |                          |             |          |
| PIR                                 | Pirin                                       | NM_001018109             | 2.07        | 0.001    |
| <b>transport</b>                    |                                             |                          |             |          |
| SLC2A3                              | solute carrier family 2, member 3           | NM_006931                | 2.04        | 0.0002   |
| SLC2A14                             | solute carrier family 2, member 14          | NM_001286233             | 2.1         | 0.0003   |
| SLC3A2                              | solute carrier family 3, member 2           | NM_001012662             | 2.51        | 0.0014   |
| <b>other enzymes</b>                |                                             |                          |             |          |
| AKR1C3                              | aldo-keto reductase family 1 member C3      | NM_001253908             | 2.06        | 0.0009   |
| DMEs...drug-metabolizing enzymes    |                                             |                          |             |          |

**Table S4: BCE treatment of EA.hy926 cells induces several NRF2 target genes.** Summary of up-regulated NRF2 target genes in BCE treated EA.hy926 cells, indicated by fold change > 2 and p value < 0.01.
